# Supplementary material for: Lessons from the implementation of a trauma center-based program to support primary care providers in managing opioids and pain after trauma hospitalization
Source: HighWire-hosted journal article supplement (doi:10.1136/tsaco-2022-001038), 2023-02-01
Supplement: tsaco-2022-001038supp001_data_supplement.pdf [file tsaco-2022-001038supp001_data_supplement.pdf]

Approved  
12/4/2020  
UW IRB

### Supplemental Digital Content

#### Supplementary File 1: Post-Intervention Survey of identified PCPs or their delegates about the acceptability, appropriateness, and feasibility of the COTAT intervention

Please answer the 6 questions below about the appropriateness, feasibility, and acceptability of the Collaborative Opioid Taper After Trauma (COTAT) study guidance to you and your practice.

1] The COTAT guidance seems applicable to my practice:

|                     |          |                            |       |                  |
|---------------------|----------|----------------------------|-------|------------------|
| 1                   | 2        | 3                          | 4     | 5                |
| Completely Disagree | Disagree | Neither agree nor disagree | Agree | Completely Agree |

2] The COTAT guidance seems doable for my practice:

|                     |          |                            |       |                  |
|---------------------|----------|----------------------------|-------|------------------|
| 1                   | 2        | 3                          | 4     | 5                |
| Completely Disagree | Disagree | Neither agree nor disagree | Agree | Completely Agree |

3] I like the COTAT guidance:

|                     |          |                            |       |                  |
|---------------------|----------|----------------------------|-------|------------------|
| 1                   | 2        | 3                          | 4     | 5                |
| Completely Disagree | Disagree | Neither agree nor disagree | Agree | Completely Agree |

4] The COTAT guidance seems implementable in my practice:

|                     |          |                            |       |                  |
|---------------------|----------|----------------------------|-------|------------------|
| 1                   | 2        | 3                          | 4     | 5                |
| Completely Disagree | Disagree | Neither agree nor disagree | Agree | Completely Agree |

5] The COTAT guidance meets my approval:

|                     |          |                            |       |                  |
|---------------------|----------|----------------------------|-------|------------------|
| 1                   | 2        | 3                          | 4     | 5                |
| Completely Disagree | Disagree | Neither agree nor disagree | Agree | Completely Agree |

6] The COTAT guidance seems suitable for my practice:

|                     |          |                            |       |                  |
|---------------------|----------|----------------------------|-------|------------------|
| 1                   | 2        | 3                          | 4     | 5                |
| Completely Disagree | Disagree | Neither agree nor disagree | Agree | Completely Agree |
